# Supplementary material for: Iridium complex loaded polypyrrole nanoparticles for NIR laser induced photothermal effect and generation of singlet oxygen
Source: Royal Society of Chemistry journal article supplement (doi:10.1039/c5ra22092k), 2016-01-01
Supplement: c5ra22092k1.pdf [file c5ra22092k1.pdf]

## Supporting Information

### **Iridium Complex Loaded Polypyrrole Nanoparticles for NIR Laser Induced Photothermal Effect and Generation of Singlet Oxygen**

Fengfeng Xue, Min Shi, Yuping Yan, Hong Yang\*, Zhiguo Zhou, Shiping Yang\*

<sup>1</sup>The Education Ministry Key Lab of Resource Chemistry and Shanghai Key Laboratory of Rare Earth Functional Materials, Shanghai Normal University, Shanghai, 200234, P. R. China.

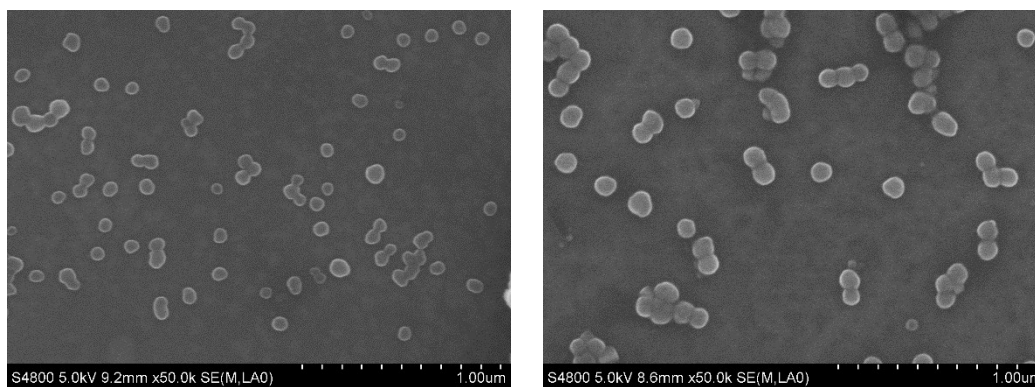

**Figure S1:** SEM images of mono-dispersed Ir-PPy NPs (left) and PPy NPs (right).

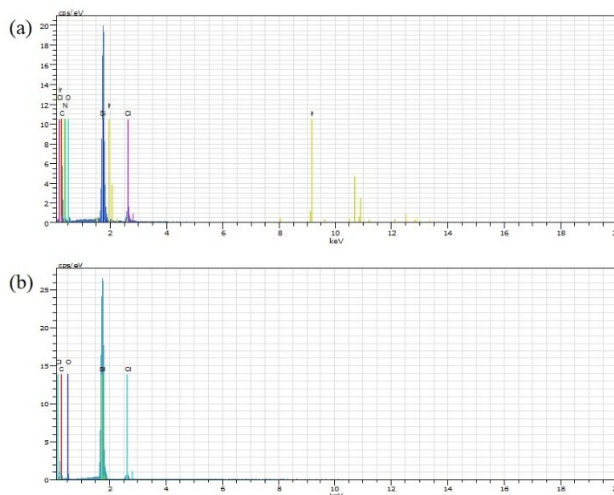

**Figure S2:** The EDS data of Ir-PPy NPs (a) and PPy NPs (b).
